# Supplementary material
Source: publisher figshare collection journal article supplement (https://acs.figshare.com/ndownloader/files/4159552)

# A Centrifugation Assisted Micro-reactor Enables Facile Integration of Trypsin Digestion, HILIC Enrichment and On-column Deglycosylation for Rapid and Sensitive Glycoproteome Analysis

Jun Zhu, Fangjun Wang, Rui Chen, Kai Cheng, Bo Xu, Zhimou Guo, Xinmiao Liang, Mingliang Ye\*, Hanfa Zou\*

CAS Key Lab of Separation Sciences for Analytical Chemistry, National Chromatographic Research and Analysis Center, Dalian Institute of Chemical Physics, Chinese Academy of Sciences, Dalian 116023, China;

\* To whom correspondence should be addressed. Prof. Hanfa Zou: phone, +86-411-84379610; fax, +86-411-84379620; e-mail, hanfazou@dicp.ac.cn. Prof. Mingliang Ye: phone, +86-411-84379620; fax, +86-411-84379620; e-mail, mingliang@dicp.ac.cn.

## SUPPORTING INFORMATION

- Figure S1. MALDI-TOF mass spectra of 1  $\mu$ g human IgG digest (A) before enrichment and (B-D) after enrichment with different loading buffer by click maltose-HILIC tips. The enriched glycopeptides were marked with “ \* ”. (E) is the spectrum after on-column deglycosylation with 20  $\mu$ L 20mM  $\text{NH}_4\text{HCO}_3$  containing 100 U PNGase F for 30 min.
- Figure S2. Reproducibility of the reactor. The presented MALDI-TOF spectra were analysis of glycopeptides from three repeat processings of 1 $\mu$ g human IgG by the reactor. The glycopeptides were eluted without deglycosylation.
- Figure S3. Sensitivity for analysis of glycopeptides in human IgG when conventional digestion was used. The enriched glycopeptides were marked with “ \* ”.
- Figure S4. MS/MS spectra of glycopeptides identified from 1  $\mu$ g five-glycoprotein mixture by using the micro-reactor based method.

Figure S1

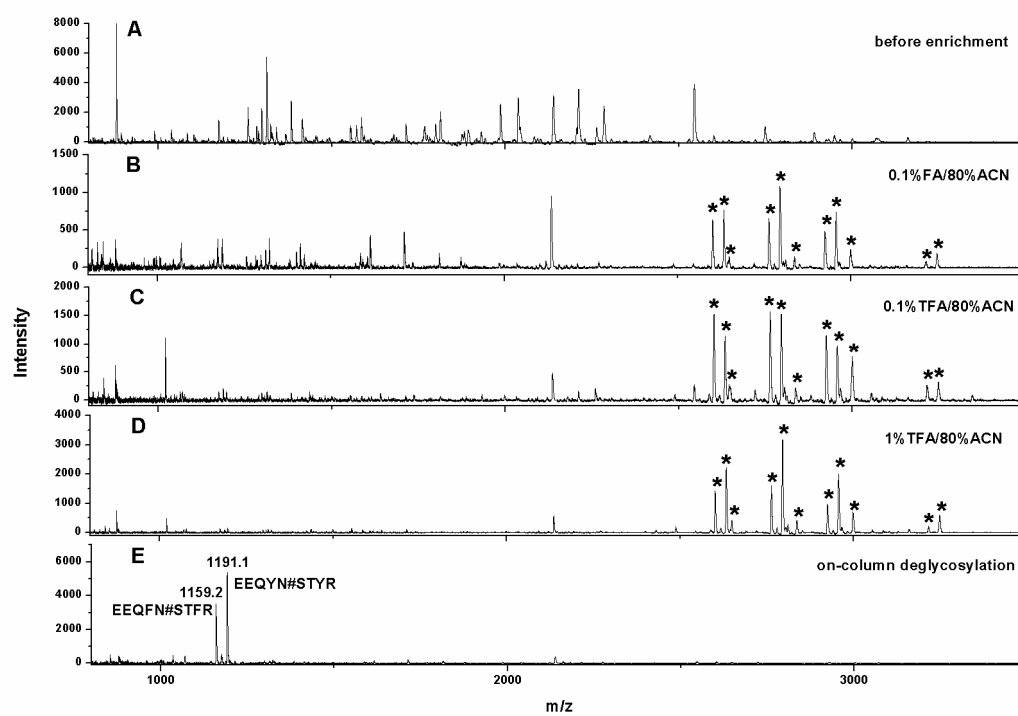

Figure S2

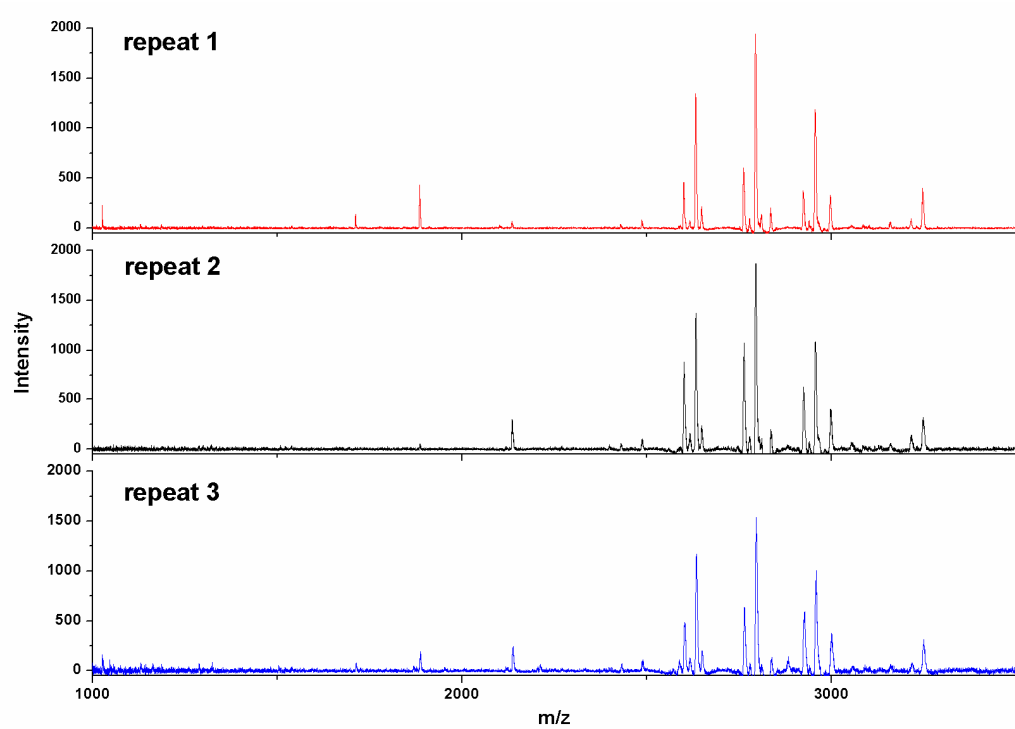

Figure S3

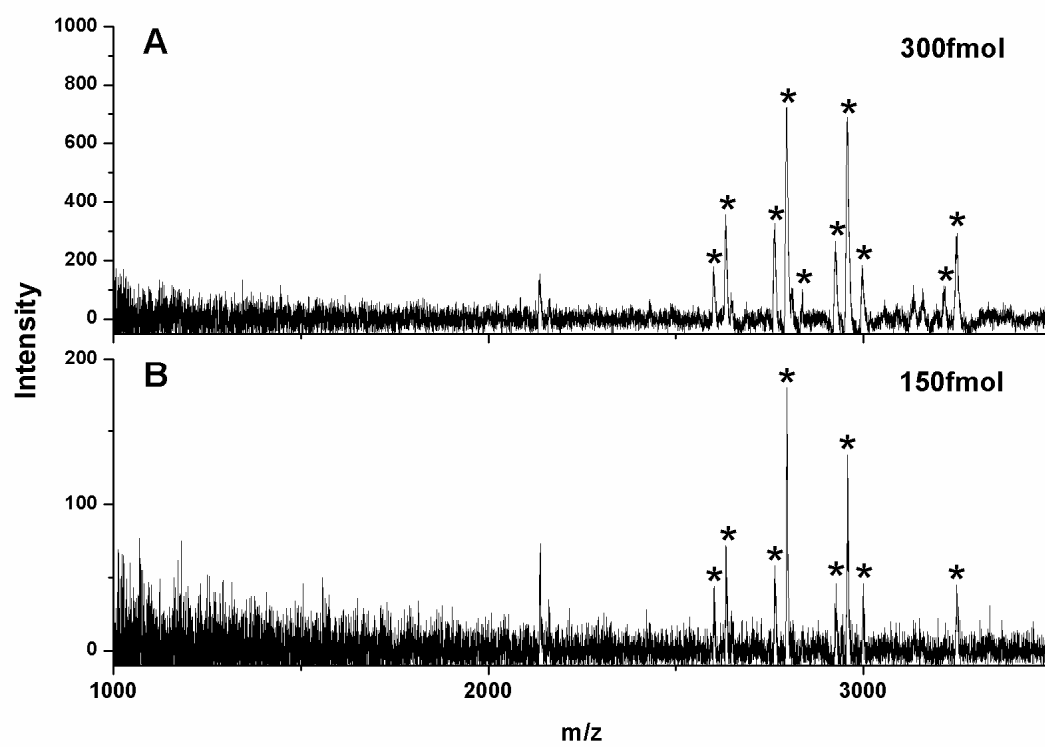

Figure S4

CGLVPVLAENY**N**K.S

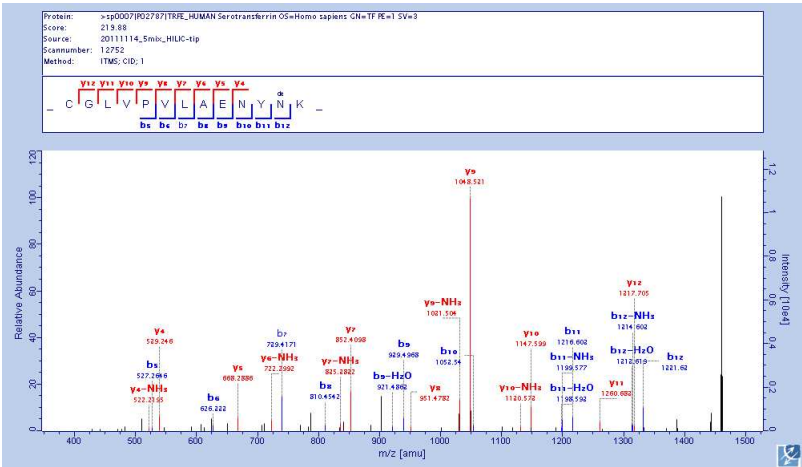

QQQH**L**FGS**N**VTDCSGN**F**CLFR

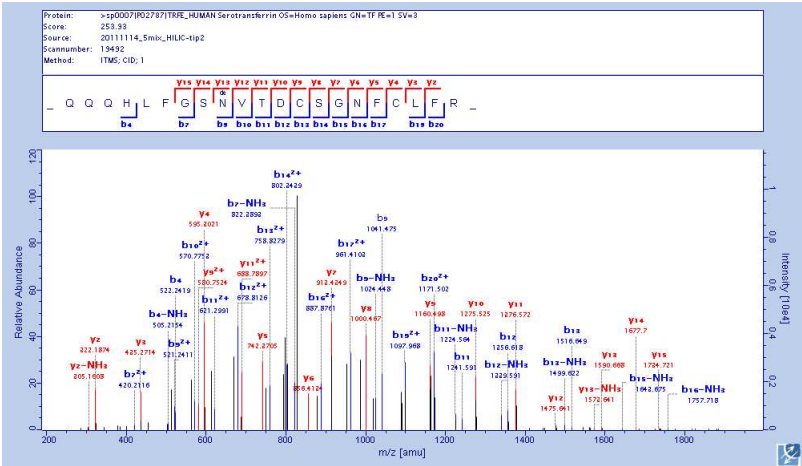

LCPCDLLAP**L**NSR

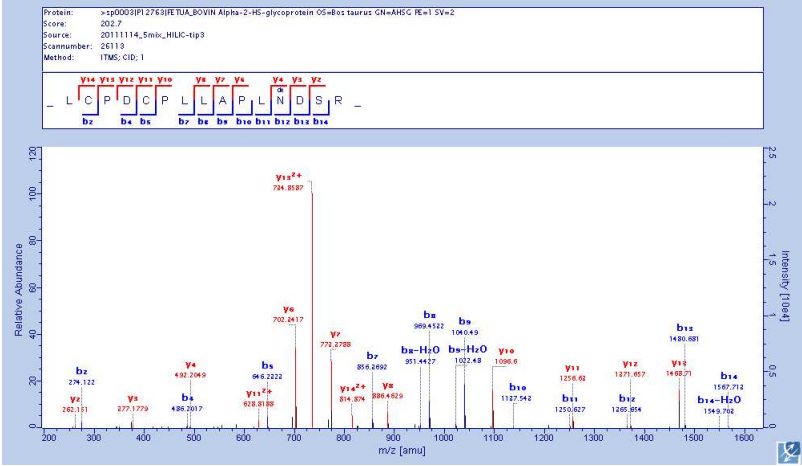

[illegible][illegible]

Protein: s-sp000425SD421FE\_B0UVN Retain-B OS=bostrus GN=FE18B RE=2.5V=)

Score: 156.82

Source: 20111114\_5mbi\_n\_HLIC-tip2

Scannumber: 16100

Method: ITMS; CID: 1

**Sequence:** **- I F Y L P A Y N C T L R P V S Q S A I I M T C P D C P S T S P Y D L S N P R -**

**Mass Spectrum:**

Relative Abundance vs. m/z [amu]

Key peaks labeled:

- b<sub>1</sub>** 424.2321
- y<sub>8</sub>** 586.2207
- y<sub>1</sub>** 592.278
- y<sub>1</sub>+2** 922.292
- y<sub>1</sub>+4** 981.4728
- y<sub>1</sub>** 1045.509
- y<sub>1</sub>+2** 1065.50
- y<sub>1</sub>+4** 1085.51
- y<sub>1</sub>** 1165.979
- y<sub>1</sub>+2** 1185.97
- y<sub>1</sub>+4** 1226.586
- y<sub>1</sub>** 1351.106
- y<sub>1</sub>+2** 1371.294
- y<sub>1</sub>** 1447.162
- y<sub>1</sub>** 1492.469
- y<sub>1</sub>** 1512.751
- y<sub>1</sub>** 1531.754
- y<sub>1</sub>** 1551.754
- y<sub>1</sub>** 1571.754
- y<sub>1</sub>** 1591.754
- y<sub>1</sub>** 1611.754
- y<sub>1</sub>** 1631.754
- y<sub>1</sub>** 1651.754
- y<sub>1</sub>** 1671.754
- y<sub>1</sub>** 1691.754
- y<sub>1</sub>** 1711.754
- y<sub>1</sub>** 1731.754
- y<sub>1</sub>** 1751.754
- y<sub>1</sub>** 1771.754
- y<sub>1</sub>** 1791.754
- y<sub>1</sub>** 1811.754
- y<sub>1</sub>** 1831.754
- y<sub>1</sub>** 1851.754
- y<sub>1</sub>** 1871.754
- y<sub>1</sub>** 1891.754
- y<sub>1</sub>** 1911.754
- y<sub>1</sub>** 1931.754
- y<sub>1</sub>** 1951.754
- y<sub>1</sub>** 1971.754
- y<sub>1</sub>** 1991.754
- y<sub>1</sub>** 2011.754
- y<sub>1</sub>** 2031.754
- y<sub>1</sub>** 2051.754
- y<sub>1</sub>** 2071.754
- y<sub>1</sub>** 2091.754
- y<sub>1</sub>** 2111.754
- y<sub>1</sub>** 2131.754
- y<sub>1</sub>** 2151.754
- y<sub>1</sub>** 2171.754
- y<sub>1</sub>** 2191.754
- y<sub>1</sub>** 2211.754
- y<sub>1</sub>** 2231.754
- y<sub>1</sub>** 2251.754
- y<sub>1</sub>** 2271.754
- y<sub>1</sub>** 2291.754
- y<sub>1</sub>** 2311.754
- y<sub>1</sub>** 2331.754
- y<sub>1</sub>** 2351.754
- y<sub>1</sub>** 2371.754
- y<sub>1</sub>** 2391.754
- y<sub>1</sub>** 2411.754
- y<sub>1</sub>** 2431.754
- y<sub>1</sub>** 2451.754
- y<sub>1</sub>** 2471.754
- y<sub>1</sub>** 2491.754
- y<sub>1</sub>** 2511.754
- y<sub>1</sub>** 2531.754
- y<sub>1</sub>** 2551.754
- y<sub>1</sub>** 2571.754
- y<sub>1</sub>** 2591.754
- y<sub>1</sub>** 2611.754
- y<sub>1</sub>** 2631.754
- y<sub>1</sub>** 2651.754
- y<sub>1</sub>** 2671.754
- y<sub>1</sub>** 2691.754
- y<sub>1</sub>** 2711.754
- y<sub>1</sub>** 2731.754
- y<sub>1</sub>** 2751.754
- y<sub>1</sub>** 2771.754
- y<sub>1</sub>** 2791.754
- y<sub>1</sub>** 2811.754
- y<sub>1</sub>** 2831.754
- y<sub>1</sub>** 2851.754
- y<sub>1</sub>** 2871.754
- y<sub>1</sub>** 2891.754
- y<sub>1</sub>** 2911.754
- y<sub>1</sub>** 2931.754
- y<sub>1</sub>** 2951.754
- y<sub>1</sub>** 2971.754
- y<sub>1</sub>** 2991.754
- y<sub>1</sub>** 3011.754
- y<sub>1</sub>** 3031.754
- y<sub>1</sub>** 3051.754
- y<sub>1</sub>** 3071.754
- y<sub>1</sub>** 3091.754
- y<sub>1</sub>** 3111.754
- y<sub>1</sub>** 3131.754
- y<sub>1</sub>** 3151.754
- y<sub>1</sub>** 3171.754
- y<sub>1</sub>** 3191.754
- y<sub>1</sub>** 3211.754
- y<sub>1</sub>** 3231.754
- y<sub>1</sub>** 3251.754
- y<sub>1</sub>** 3271.754
- y<sub>1</sub>** 3291.754
- y<sub>1</sub>** 3311.754
- y<sub>1</sub>** 3331.754
- y<sub>1</sub>** 3351.754
- y<sub>1</sub>** 3371.754
- y<sub>1</sub>** 3391.754
- y<sub>1</sub>** 3411.754
- y<sub>1</sub>** 3431.754
- y<sub>1</sub>** 3451.754
- y<sub>1</sub>** 3471.754
- y<sub>1</sub>** 3491.754
- y<sub>1</sub>** 3511.754
- y<sub>1</sub>** 3531.754
- y<sub>1</sub>** 3551.754
- y<sub>1</sub>** 3571.754
- y<sub>1</sub>** 3591.754
- y<sub>1</sub>** 3611.754
- y<sub>1</sub>** 3631.754
- y<sub>1</sub>** 3651.754
- y<sub>1</sub>** 3671.754
- y<sub>1</sub>** 3691.754
- y<sub>1</sub>** 3711.754
- y<sub>1</sub>** 3731.754
- y<sub>1</sub>** 3751.754
- y<sub>1</sub>** 3771.754
- y<sub>1</sub>** 3791.754
- y<sub>1</sub>** 3811.754
- y<sub>1</sub>** 3831.754
- y<sub>1</sub>** 3851.754
- y<sub>1</sub>** 3871.754
- y<sub>1</sub>** 3891.754
- y<sub>1</sub>** 3911.754
- y<sub>1</sub>** 3931.754
- y<sub>1</sub>** 3951.754
- y<sub>1</sub>** 3971.754
- y<sub>1</sub>** 3991.754
- y<sub>1</sub>** 4011.754
- y<sub>1</sub>** 4031.754
- y<sub>1</sub>** 4051.754
- y<sub>1</sub>** 4071.754
- y<sub>1</sub>** 4091.754
- y<sub>1</sub>** 4111.754
- y<sub>1</sub>** 4131.754
- y<sub>1</sub>** 4151.754
- y<sub>1</sub>** 4171.754
- y<sub>1</sub>** 4191.754
- y<sub>1</sub>** 4211.754
- y<sub>1</sub>** 4231.754
- y<sub>1</sub>** 4251.754
- y<sub>1</sub>** 4271.754
- y<sub>1</sub>** 4291.754
- y<sub>1</sub>**

GENATVNQRPANPSK

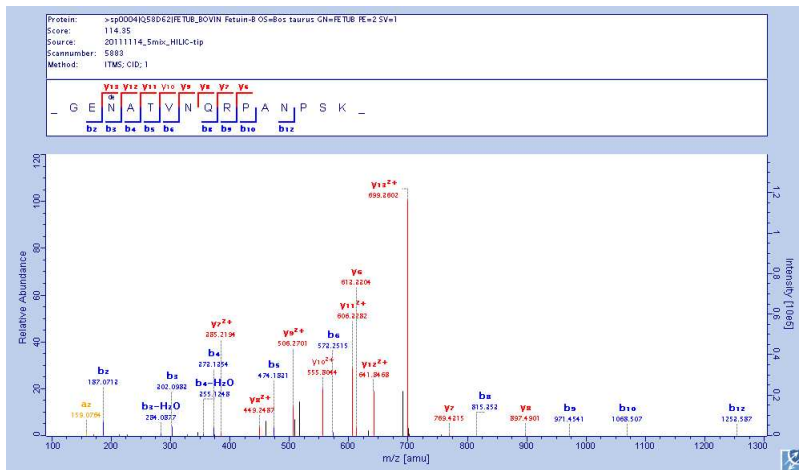

GENATVNQR

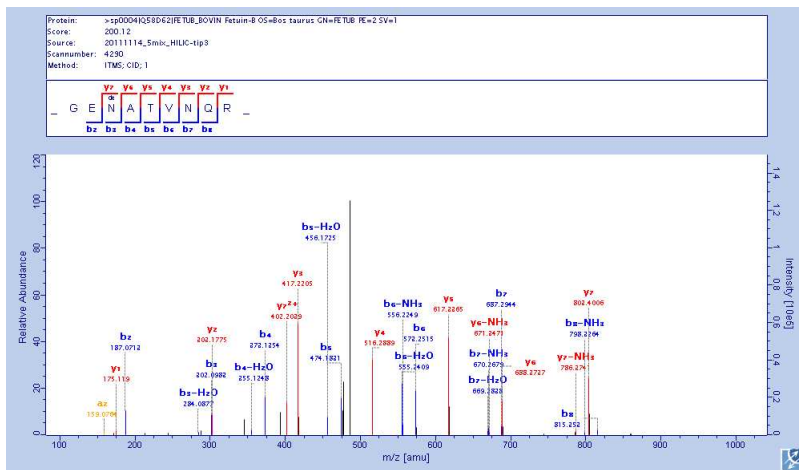

NEEYNK.S

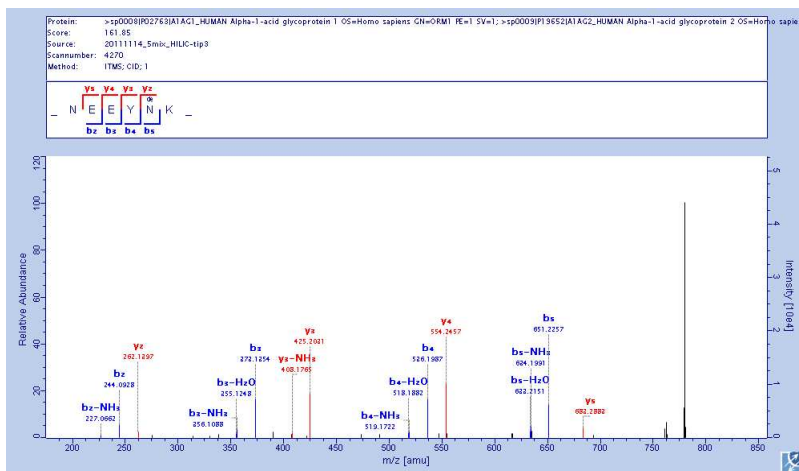



Protein: >sp000810|P02731|AT1G1.05.00 Homo sapiens cNOS-ORF1 [pe=1 SV1]

Score: 394.28

Source: 20111114\_5mhc\_HLUC-tlp3

Scan number: 13639

Method: ITMS; CID: 1

| Y14 | Y15 | Y12 | Y13 | Y5 | Y6 | Y7  | Y4  | Y3  | Y1  | Y2  |
|-----|-----|-----|-----|----|----|-----|-----|-----|-----|-----|
| Q   | D   | Q   | C   | I  | Y  | N   | T   | T   | Y   | L   |
| b5  | b4  | b5  | b4  | b7 | b5 | b10 | b11 | b12 | b15 | b14 |

Mass spectrum plot showing relative abundance versus m/z. The x-axis ranges from 300 to 1800 m/z, and the y-axis ranges from 0 to 120 relative abundance. Numerous peaks are labeled with their m/z values and corresponding ion types (e.g., Y4, b5-NH2, b7, b10, b11, b12, b15, b14). The base peak is at m/z 1006.232 (b7). Other significant peaks include m/z 1107.441 (b5-H2O), 1272.622 (Y10), and 1597.006 (b10-NH2).

Protein: >sp0081P00273J[ATAC]\_HUMAN Alpha-1-acid glycoprotein 1 OS=Homo sapiens GN=ORM1 IE=1 SV=1

Score: 125.21

Source: 20111114\_5mhc\_HUIC-4ip3

Scannumber: 13559

Method: ITMS; CID: 1

**Y1 Y2 Y3 Y4 Y5 Y6 Y7 Y8 Y9 Y10 Y11 Y12 Y13 Y14 Y15 Y16 Y17 Y18 Y19 Y20 Y21 Y22 Y23 Y24 Y25 Y26 Y27 Y28 Y29 Y30 Y31 Y32 Y33 Y34 Y35 Y36 Y37 Y38 Y39 Y40 Y41 Y42 Y43 Y44 Y45 Y46 Y47 Y48 Y49 Y50 Y51 Y52 Y53 Y54 Y55 Y56 Y57 Y58 Y59 Y60 Y61 Y62 Y63 Y64 Y65 Y66 Y67 Y68 Y69 Y70 Y71 Y72 Y73 Y74 Y75 Y76 Y77 Y78 Y79 Y80 Y81 Y82 Y83 Y84 Y85 Y86 Y87 Y88 Y89 Y90 Y91 Y92 Y93 Y94 Y95 Y96 Y97 Y98 Y99 Y100**

**Q D Q C I Y N T T Y L N V Q R E N G T I S R**

**b1 b2 b3 b4 b5 b6 b7 b8 b9 b10 b11 b12 b13 b14 b15 b16 b17 b18 b19 b20 b21 b22 b23 b24 b25 b26 b27 b28 b29 b30 b31 b32 b33 b34 b35 b36 b37 b38 b39 b40 b41 b42 b43 b44 b45 b46 b47 b48 b49 b50 b51 b52 b53 b54 b55 b56 b57 b58 b59 b60 b61 b62 b63 b64 b65 b66 b67 b68 b69 b70 b71 b72 b73 b74 b75 b76 b77 b78 b79 b80 b81 b82 b83 b84 b85 b86 b87 b88 b89 b90 b91 b92 b93 b94 b95 b96 b97 b98 b99 b100**

**bs bs-H<sub>2</sub>O bs-NH<sub>2</sub> Ys Ys-H<sub>2</sub>O Ys-NH<sub>2</sub> Ys<sup>2+</sup> Ys<sup>3+</sup> Ys<sup>4+</sup> Ys<sup>5+</sup> Ys<sup>6+</sup> Ys<sup>7+</sup> Ys<sup>8+</sup> Ys<sup>9+</sup> Ys<sup>10+</sup> Ys<sup>11+</sup> Ys<sup>12+</sup> Ys<sup>13+</sup> Ys<sup>14+</sup> Ys<sup>15+</sup> Ys<sup>16+</sup> Ys<sup>17+</sup> Ys<sup>18+</sup> Ys<sup>19+</sup> Ys<sup>20+</sup> Ys<sup>21+</sup> Ys<sup>22+</sup> Ys<sup>23+</sup> Ys<sup>24+</sup> Ys<sup>25+</sup> Ys<sup>26+</sup> Ys<sup>27+</sup> Ys<sup>28+</sup> Ys<sup>29+</sup> Ys<sup>30+</sup> Ys<sup>31+</sup> Ys<sup>32+</sup> Ys<sup>33+</sup> Ys<sup>34+</sup> Ys<sup>35+</sup> Ys<sup>36+</sup> Ys<sup>37+</sup> Ys<sup>38+</sup> Ys<sup>39+</sup> Ys<sup>40+</sup> Ys<sup>41+</sup> Ys<sup>42+</sup> Ys<sup>43+</sup> Ys<sup>44+</sup> Ys<sup>45+</sup> Ys<sup>46+</sup> Ys<sup>47+</sup> Ys<sup>48+</sup> Ys<sup>49+</sup> Ys<sup>50+</sup> Ys<sup>51+</sup> Ys<sup>52+</sup> Ys<sup>53+</sup> Ys<sup>54+</sup> Ys<sup>55+</sup> Ys<sup>56+</sup> Ys<sup>57+</sup> Ys<sup>58+</sup> Ys<sup>59+</sup> Ys<sup>60+</sup> Ys<sup>61+</sup> Ys<sup>62+</sup> Ys<sup>63+</sup> Ys<sup>64+</sup> Ys<sup>65+</sup> Ys<sup>66+</sup> Ys<sup>67+</sup> Ys<sup>68+</sup> Ys<sup>69+</sup> Ys<sup>70+</sup> Ys<sup>71+</sup> Ys<sup>72+</sup> Ys<sup>73+</sup> Ys<sup>74+</sup> Ys<sup>75+</sup> Ys<sup>76+</sup> Ys<sup>77+</sup> Ys<sup>78+</sup> Ys<sup>79+</sup> Ys<sup>80+</sup> Ys<sup>81+</sup> Ys<sup>82+</sup> Ys<sup>83+</sup> Ys<sup>84+</sup> Ys<sup>85+</sup> Ys<sup>86+</sup> Ys<sup>87+</sup> Ys<sup>88+</sup> Ys<sup>89+</sup> Ys<sup>90+</sup> Ys<sup>91+</sup> Ys<sup>92+</sup> Ys<sup>93+</sup> Ys<sup>94+</sup> Ys<sup>95+</sup> Ys<sup>96+</sup> Ys<sup>97+</sup> Ys<sup>98+</sup> Ys<sup>99+</sup> Ys<sup>100+</sup>**

**bs bs-H<sub>2</sub>O bs-NH<sub>2</sub> Ys Ys-H<sub>2</sub>O Ys-NH<sub>2</sub> Ys<sup>2+</sup> Ys<sup>3+</sup> Ys<sup>4+</sup> Ys<sup>5+</sup> Ys<sup>6+</sup> Ys<sup>7+</sup> Ys<sup>8+</sup> Ys<sup>9+</sup> Ys<sup>10+</sup> Ys<sup>11+</sup> Ys<sup>12+</sup> Ys<sup>13+</sup> Ys<sup>14+</sup> Ys<sup>15+</sup> Ys<sup>16+</sup> Ys<sup>17+</sup> Ys<sup>18+</sup> Ys<sup>19+</sup> Ys<sup>20+</sup> Ys<sup>21+</sup> Ys<sup>22+</sup> Ys<sup>23+</sup> Ys<sup>24+</sup> Ys<sup>25+</sup> Ys<sup>26+</sup> Ys<sup>27+</sup> Ys<sup>28+</sup> Ys<sup>29+</sup> Ys<sup>30+</sup> Ys<sup>31+</sup> Ys<sup>32+</sup> Ys<sup>33+</sup> Ys<sup>34+</sup> Ys<sup>35+</sup> Ys<sup>36+</sup> Ys<sup>37+</sup> Ys<sup>38+</sup> Ys<sup>39+</sup> Ys<sup>40+</sup> Ys<sup>41+</sup> Ys<sup>42+</sup> Ys<sup>43+</sup> Ys<sup>44+</sup> Ys<sup>45+</sup> Ys<sup>46+</sup> Ys<sup>47+</sup> Ys<sup>48+</sup> Ys<sup>49+</sup> Ys<sup>50+</sup> Ys<sup>51+</sup> Ys<sup>52+</sup> Ys<sup>53+</sup> Ys<sup>54+</sup> Ys<sup>55+</sup> Ys<sup>56+</sup> Ys<sup>57+</sup> Ys<sup>58+</sup> Ys<sup>59+</sup> Ys<sup>60+</sup> Ys<sup>61+</sup> Ys<sup>62+</sup> Ys<sup>63+</sup> Ys<sup>64+</sup> Ys<sup>65+</sup> Ys<sup>66+</sup> Ys<sup>67+</sup> Ys<sup>68+</sup> Ys<sup>69+</sup> Ys<sup>70+</sup> Ys<sup>71+</sup> Ys<sup>72+</sup> Ys<sup>73+</sup> Ys<sup>74+</sup> Ys<sup>75+</sup> Ys<sup>76+</sup> Ys<sup>77+</sup> Ys<sup>78+</sup> Ys<sup>79+</sup> Ys<sup>80+</sup> Ys<sup>81+</sup> Ys<sup>82+</sup> Ys<sup>83+</sup> Ys<sup>84+</sup> Ys<sup>85+</sup> Ys<sup>86+</sup> Ys<sup>87+</sup> Ys<sup>88+</sup> Ys<sup>89+</sup> Ys<sup>90+</sup> Ys<sup>91+</sup> Ys<sup>92+</sup> Ys<sup>93+</sup> Ys<sup>94+</sup> Ys<sup>95+</sup> Ys<sup>96+</sup> Ys<sup>97+</sup> Ys<sup>98+</sup> Ys<sup>99+</sup> Ys<sup>100+</sup>**

**bs bs-H<sub>2</sub>O bs-NH<sub>2</sub> Ys Ys-H<sub>2</sub>O Ys-NH<sub>2</sub> Ys<sup>2+</sup> Ys<sup>3+</sup> Ys<sup>4+</sup> Ys<sup>5+</sup> Ys<sup>6+</sup> Ys<sup>7+</sup> Ys<sup>8+</sup> Ys<sup>9+</sup> Ys<sup>10+</sup> Ys<sup>11+</sup> Ys<sup>12+</sup> Ys<sup>13+</sup> Ys<sup>14+</sup> Ys<sup>15+</sup> Ys<sup>16+</sup> Ys<sup>17+</sup> Ys<sup>18+</sup> Ys<sup>19+</sup> Ys<sup>20+</sup> Ys<sup>21+</sup> Ys<sup>22+</sup> Ys<sup>23+</sup> Ys<sup>24+</sup> Ys<sup>25+</sup> Ys<sup>26+</sup> Ys<sup>27+</sup> Ys<sup>28+</sup> Ys<sup>29+</sup> Ys<sup>30+</sup> Ys<sup>31+</sup> Ys<sup>32+</sup> Ys<sup>33+</sup> Ys<sup>34+</sup> Ys<sup>35+</sup> Ys<sup>36+</sup> Ys<sup>37+</sup> Ys<sup>38+</sup> Ys<sup>39+</sup> Ys<sup>40+</sup> Ys<sup>41+</sup> Ys<sup>42+</sup> Ys<sup>43+</sup> Ys<sup>44+</sup> Ys<sup>45+</sup> Ys<sup>46+</sup> Ys<sup>47+</sup> Ys<sup>48+</sup> Ys<sup>49+</sup> Ys<sup>50+</sup> Ys<sup>51+</sup> Ys<sup>52+</sup> Ys<sup>53+</sup> Ys<sup>54+</sup> Ys<sup>55+</sup> Ys<sup>56+</sup> Ys<sup>57+</sup> Ys<sup>58+</sup> Ys<sup>59+</sup> Ys<sup>60+</sup> Ys<sup>61+</sup> Ys<sup>62+</sup> Ys<sup>63+</sup> Ys<sup>64+</sup> Ys<sup>65+</sup> Ys<sup>66+</sup> Ys<sup>67+</sup> Ys<sup>68+</sup> Ys<sup>69+</sup> Ys<sup>70+</sup> Ys<sup>71+</sup> Ys<sup>72+</sup> Ys<sup>73+</sup> Ys<sup>74+</sup> Ys<sup>75+</sup> Ys<sup>76+</sup> Ys<sup>77+</sup> Ys<sup>78+</sup> Ys<sup>79+</sup> Ys<sup>80+</sup> Ys<sup>81+</sup> Ys<sup>82+</sup> Ys<sup>83+</sup> Ys<sup>84+</sup> Ys<sup>85+</sup> Ys<sup>86+</sup> Ys<sup>87+</sup> Ys<sup>88+</sup> Ys<sup>89+</sup> Ys<sup>90+</sup> Ys<sup>91+</sup> Ys<sup>92+</sup> Ys<sup>93+</sup> Ys<sup>94+</sup> Ys<sup>95+</sup> Ys<sup>96+</sup> Ys<sup>97+</sup> Ys<sup>98+</sup> Ys<sup>99+</sup> Ys<sup>100+</sup>**

**bs bs-H<sub>2</sub>O bs-NH<sub>2</sub> Ys Ys-H<sub>2</sub>O Ys-NH<sub>2</sub> Ys<sup>2+</sup> Ys<sup>3+</sup> Ys<sup>4+</sup> Ys<sup>5+</sup> Ys<sup>6+</sup> Ys<sup>7+</sup> Ys<sup>8+</sup> Ys<sup>9+</sup> Ys<sup>10+</sup> Ys<sup>11+</sup> Ys<sup>12+</sup> Ys<sup>13+</sup> Ys<sup>14+</sup> Ys<sup>15+</sup> Ys<sup>16+</sup> Ys<sup>17+</sup> Ys<sup>18+</sup> Ys<sup>19+</sup> Ys<sup>20+</sup> Ys<sup>21+</</sup>**

Protein: >sp0008|P02763|A1AG1\_HUMAN Glycine-1-acid glycoprotein 1 OS=Homo sapiens GN=ORM1 IE=1 SV=1. >sp0003|P13652|A1AG2\_HUMAN Glycine-2-acid glycoprotein 2 OS=Homo sapiens

Score: 161.85

Source: 20111114\_5mhc\_HLUC-tip3

Scan number: 4270

Method: ITMS; CID: 1

**Peptide Sequence:** N E E Y N K

**Mass Spectrum:**

| m/z [amu] | Relative Abundance (%) | Fragmentation Type  |
|-----------|------------------------|---------------------|
| 227.0660  | ~10                    | bs-NH <sub>2</sub>  |
| 244.0628  | ~15                    | bs                  |
| 260.1297  | ~25                    | Y2                  |
| 256.1089  | ~10                    | bs-NH <sub>2</sub>  |
| 255.1248  | ~15                    | bs-H <sub>2</sub> O |
| 272.1254  | ~20                    | bs                  |
| 408.1795  | ~15                    | Y3                  |
| 415.2041  | ~20                    | Y4                  |
| 438.1882  | ~15                    | bs-NH <sub>2</sub>  |
| 518.1722  | ~10                    | bs-NH <sub>2</sub>  |
| 519.1722  | ~10                    | bs-NH <sub>2</sub>  |
| 526.1987  | ~15                    | bs                  |
| 554.2457  | ~35                    | Y4                  |
| 604.1991  | ~15                    | bs-NH <sub>2</sub>  |
| 602.2151  | ~15                    | bs-H <sub>2</sub> O |
| 651.2257  | ~30                    | bs                  |
| 682.2392  | ~10                    | Y5                  |
| 770.0000  | 100                    | bs                  |

Protein: >sp00091P1|A2AC2\_HUMAN Alpha-1-acid glycoprotein 1 OS=Homo sapiens GR=NM2 RE=1 SV=2  
 Score: 248.13  
 Source: 20111114\_5mbs\_HILIC-tp2  
 Scannumber: 11360  
 Method: ITMS;CID; 1

- N Q N Q C F Y I N S S Y L N V I Q R -  
 bs bz bs bs bs bs bs bs bs bs bs bs

Relative Abundance (0 to 120)  
 m/z [amu] (200 to 1600)

Labeled Peaks (m/z):  
 226.0822 (bs-NH<sub>2</sub>), 260.1775 (Y), 285.3136 (Ys-NH<sub>2</sub>), 306.3310 (Ys), 326.3585 (Ys-NH<sub>2</sub>), 402.2459 (Ys), 421.3085 (Ys-NH<sub>2</sub>), 440.2278 (Ys), 478.082 (Ys-NH<sub>2</sub>), 516.2895 (Ys), 609.2668 (bs), 629.2729 (Ys), 678.2668 (bs), 702.7877 (bs), 762.4230 (Ys), 794.7227 (Ys), 810.2424 (Ys), 875.6582 (Ys), 949.5002 (bs-NH<sub>2</sub>), 956.2567 (bs), 961.2237 (bs), 969.4758 (bs-NH<sub>2</sub>), 985.278 (bs-H<sub>2</sub>O), 1026.262 (bs-NH<sub>2</sub>), 1042.289 (bs), 1112.41 (bs), 1130.421 (bs), 1152.296 (bs-NH<sub>2</sub>), 1226.418 (bs), 1276.476 (bs-NH<sub>2</sub>), 1292.436 (bs), 1406.350 (bs), 1428.518 (bs-NH<sub>2</sub>), 1495.350 (bs), 1520.81 (bs)

Protein: >sp000391P13652:TAG2\_HUMAN Alpha-1-acid glycoprotein 2 OS=Homo sapiens GN=ORM2 RE=1 SVW2

Score: 84.12

Source: 20111114\_5mk\_HILUC-tip3

Scannumber: 12687

Method: ITMS; CID: 1

**Sequence:**

Q N Q C F Y N S Y L N V Q R E N G T V S R

**Masses:**

b<sub>2</sub> b<sub>4</sub> b<sub>7</sub> b<sub>10</sub> b<sub>12</sub> b<sub>13</sub>

**Masses:**

y<sub>2</sub> y<sub>3</sub> y<sub>5</sub> y<sub>6</sub> y<sub>7</sub> y<sub>8</sub> y<sub>9</sub> y<sub>10</sub> y<sub>11</sub> y<sub>12</sub> y<sub>13</sub> y<sub>14</sub> y<sub>15</sub> y<sub>16</sub> y<sub>17</sub> y<sub>18</sub> y<sub>19</sub> y<sub>20</sub> y<sub>21</sub> y<sub>22</sub> y<sub>23</sub> y<sub>24</sub> y<sub>25</sub> y<sub>26</sub> y<sub>27</sub> y<sub>28</sub> y<sub>29</sub> y<sub>30</sub> y<sub>31</sub> y<sub>32</sub> y<sub>33</sub> y<sub>34</sub> y<sub>35</sub> y<sub>36</sub> y<sub>37</sub> y<sub>38</sub> y<sub>39</sub> y<sub>40</sub> y<sub>41</sub> y<sub>42</sub> y<sub>43</sub> y<sub>44</sub> y<sub>45</sub> y<sub>46</sub> y<sub>47</sub> y<sub>48</sub> y<sub>49</sub> y<sub>50</sub> y<sub>51</sub> y<sub>52</sub> y<sub>53</sub> y<sub>54</sub> y<sub>55</sub> y<sub>56</sub> y<sub>57</sub> y<sub>58</sub> y<sub>59</sub> y<sub>60</sub> y<sub>61</sub> y<sub>62</sub> y<sub>63</sub> y<sub>64</sub> y<sub>65</sub> y<sub>66</sub> y<sub>67</sub> y<sub>68</sub> y<sub>69</sub> y<sub>70</sub> y<sub>71</sub> y<sub>72</sub> y<sub>73</sub> y<sub>74</sub> y<sub>75</sub> y<sub>76</sub> y<sub>77</sub> y<sub>78</sub> y<sub>79</sub> y<sub>80</sub> y<sub>81</sub> y<sub>82</sub> y<sub>83</sub> y<sub>84</sub> y<sub>85</sub> y<sub>86</sub> y<sub>87</sub> y<sub>88</sub> y<sub>89</sub> y<sub>90</sub> y<sub>91</sub> y<sub>92</sub> y<sub>93</sub> y<sub>94</sub> y<sub>95</sub> y<sub>96</sub> y<sub>97</sub> y<sub>98</sub> y<sub>99</sub> y<sub>100</sub> y<sub>101</sub> y<sub>102</sub> y<sub>103</sub> y<sub>104</sub> y<sub>105</sub> y<sub>106</sub> y<sub>107</sub> y<sub>108</sub> y<sub>109</sub> y<sub>110</sub> y<sub>111</sub> y<sub>112</sub> y<sub>113</sub> y<sub>114</sub> y<sub>115</sub> y<sub>116</sub> y<sub>117</sub> y<sub>118</sub> y<sub>119</sub> y<sub>120</sub> y<sub>121</sub> y<sub>122</sub> y<sub>123</sub> y<sub>124</sub> y<sub>125</sub> y<sub>126</sub> y<sub>127</sub> y<sub>128</sub> y<sub>129</sub> y<sub>130</sub> y<sub>131</sub> y<sub>132</sub> y<sub>133</sub> y<sub>134</sub> y<sub>135</sub> y<sub>136</sub> y<sub>137</sub> y<sub>138</sub> y<sub>139</sub> y<sub>140</sub> y<sub>141</sub> y<sub>142</sub> y<sub>143</sub> y<sub>144</sub> y<sub>145</sub> y<sub>146</sub> y<sub>147</sub> y<sub>148</sub> y<sub>149</sub> y<sub>150</sub> y<sub>151</sub> y<sub>152</sub> y<sub>153</sub> y<sub>154</sub> y<sub>155</sub> y<sub>156</sub> y<sub>157</sub> y<sub>158</sub> y<sub>159</sub> y<sub>160</sub> y<sub>161</sub> y<sub>162</sub> y<sub>163</sub> y<sub>164</sub> y<sub>165</sub> y<sub>166</sub> y<sub>167</sub> y<sub>168</sub> y<sub>169</sub> y<sub>170</sub> y<sub>171</sub> y<sub>172</sub> y<sub>173</sub> y<sub>174</sub> y<sub>175</sub> y<sub>176</sub> y<sub>177</sub> y<sub>178</sub> y<sub>179</sub> y<sub>180</sub> y<sub>181</sub> y<sub>182</sub> y<sub>183</sub> y<sub>184</sub> y<sub>185</sub> y<sub>186</sub> y<sub>187</sub> y<sub>188</sub> y<sub>189</sub> y<sub>190</sub> y<sub>191</sub> y<sub>192</sub> y<sub>193</sub> y<sub>194</sub> y<sub>195</sub> y<sub>196</sub> y<sub>197</sub> y<sub>198</sub> y<sub>199</sub> y<sub>200</sub> y<sub>201</sub> y<sub>202</sub> y<sub>203</sub> y<sub>204</sub> y<sub>205</sub> y<sub>206</sub> y<sub>207</sub> y<sub>208</sub> y<sub>209</sub> y<sub>210</sub> y<sub>211</sub> y<sub>212</sub> y<sub>213</sub> y<sub>214</sub> y<sub>215</sub> y<sub>216</sub> y<sub>217</sub> y<sub>218</sub> y<sub>219</sub> y<sub>220</sub> y<sub>221</sub> y<sub>222</sub> y<sub>223</sub> y<sub>224</sub> y<sub>225</sub> y<sub>226</sub> y<sub>227</sub> y<sub>228</sub> y<sub>229</sub> y<sub>230</sub> y<sub>231</sub> y<sub>232</sub> y<sub>233</sub> y<sub>234</sub> y<sub>235</sub> y<sub>236</sub> y<sub>237</sub> y<sub>238</sub> y<sub>239</sub> y<sub>240</sub> y<sub>241</sub> y<sub>242</sub> y<sub>243</sub> y<sub>244</sub> y<sub>245</sub> y<sub>246</sub> y<sub>247</sub> y<sub>248</sub> y<sub>249</sub> y<sub>250</sub> y<sub>251</sub> y<sub>252</sub> y<sub>253</sub> y<sub>254</sub> y<sub>255</sub> y<sub>256</sub> y<sub>257</sub> y<sub>258</sub> y<sub>259</sub> y<sub>260</sub> y<sub>261</sub> y<sub>262</sub> y<sub>263</sub> y<sub>264</sub> y<sub>265</sub> y<sub>266</sub> y<sub>267</sub> y<sub>268</sub> y<sub>269</sub> y<sub>270</sub> y<sub>271</sub> y<sub>272</sub> y<sub>273</sub> y<sub>274</sub> y<sub>275</sub> y<sub>276</sub> y<sub>277</sub> y<sub>278</sub> y<sub>279</sub> y<sub>280</sub> y<sub>281</sub> y<sub>282</sub> y<sub>283</sub> y<sub>284</sub> y<sub>285</sub> y<sub>286</sub> y<sub>287</sub> y<sub>288</sub> y<sub>289</sub> y<sub>290</sub> y<sub>291</sub> y<sub>292</sub> y<sub>293</sub> y<sub>294</sub> y<sub>295</sub> y<sub>296</sub> y<sub>297</sub> y<sub>298</sub> y<sub>299</sub> y<sub>300</sub> y<sub>301</sub> y<sub>302</sub> y<sub>303</sub> y<sub>304</sub> y<sub>305</sub> y<sub>306</sub> y<sub>307</sub> y<sub>308</sub> y<sub>309</sub> y<sub>310</sub> y<sub>311</sub> y<sub>312</sub> y<sub>313</sub> y<sub>314</sub> y<sub>315</sub> y<sub>316</sub> y<sub>317</sub> y<sub>318</sub> y<sub>319</sub> y<sub>320</sub> y<sub>321</sub> y<sub>322</sub> y<sub>323</sub> y<sub>324</sub> y<sub>325</sub> y<sub>326</sub> y<sub>327</sub> y<sub>328</sub> y<sub>329</sub> y<sub>330</sub> y<sub>331</sub> y<sub>332</sub> y<sub>333</sub> y<sub>334</sub> y<sub>335</sub> y<sub>336</sub> y<sub>337</sub> y<sub>338</sub> y<sub>339</sub> y<sub>340</sub> y<sub>341</sub> y<sub>342</sub> y<sub>343</sub> y<sub>344</sub> y<sub>345</sub> y<sub>346</sub> y<sub>347</sub> y<sub>348</sub> y<sub>349</sub> y<sub>350</sub> y<sub>351</sub> y<sub>352</sub> y<sub>353</sub> y<sub>354</sub> y<sub>355</sub> y<sub>356</sub> y<sub>357</sub> y<sub>358</sub> y<sub>359</sub> y<sub>360</sub> y<sub>361</sub> y<sub>362</sub> y<sub>363</sub> y<sub>364</sub> y<sub>365</sub> y<sub>366</sub> y<sub>367</sub> y<sub>368</sub> y<sub>369</sub> y<sub>370</sub> y<sub>371</sub> y<sub>372</sub> y<sub>373</sub> y<sub>374</sub> y<sub>375</sub> y<sub>376</sub> y<sub>377</sub> y<sub>378</sub> y<sub>379</sub> y<sub>380</sub> y<sub>381</sub> y<sub>382</sub> y<sub>383</sub> y<sub>384</sub> y<sub>385</sub> y<sub>386</sub> y<sub>387</sub> y<sub>388</sub> y<sub>389</sub> y<sub>390</sub> y<sub>391</sub> y<sub>392</sub> y<sub>393</sub> y<sub>394</sub> y<sub>395</sub> y<sub>396</sub> y<sub>397</sub> y<sub>398</sub> y<sub>399</sub>

Protein: xp00023101.85|IGHG1\_HUMAN Ig gamma-1 chain C region OS=Homo sapiens GN=IGHG1 RE=1

Score: 129.03

Source: 20111114\_5mks\_HILUC-tip3

Scan number: 6953

Method: LTMS, CID: 1

|                |                |                |                |                |                |                |                |
|----------------|----------------|----------------|----------------|----------------|----------------|----------------|----------------|
| Y <sup>6</sup> | Y <sup>7</sup> | Y <sup>8</sup> | Y <sup>9</sup> | Y <sup>4</sup> | Y <sup>2</sup> | Y <sup>5</sup> | Y <sup>1</sup> |
| E              | Q              | Y              | N              | S              | T              | Y              | R              |
| b <sub>2</sub> | b <sub>2</sub> | b <sub>4</sub> | b <sub>4</sub> | b <sub>2</sub> | b <sub>2</sub> | b <sub>2</sub> |                |

Relative Abundance

m/z [amu]

Peak Data:

| m/z      | Label  |
|----------|--------|
| 175.1119 | Y1     |
| 195.1119 | Y1     |
| 215.0921 | b2     |
| 221.1557 | Y2-NH3 |
| 228.1822 | Y2     |
| 249.1405 | b4-H2O |
| 270.1245 | b5-NH3 |
| 286.7091 | Y4+H   |
| 395.1729 | b4     |
| 398.1729 | b4-H2O |
| 420.22   | Y3     |
| 522.2028 | b4-H2O |
| 526.1062 | Y4     |
| 641.2089 | Y1     |
| 647.2207 | b5-H2O |
| 721.248  | b5-NH3 |
| 724.2628 | b5-H2O |
| 802.2105 | b2-H2O |
| 808.2522 | Y6     |
| 909.0578 | b4-NH3 |
| 912.4100 | Y7-NH3 |
| 915.2361 | Y7     |
| 95.221   | b2     |
| 101.0124 | b4     |
| 108.1452 | Y6     |

EEQFNSTFR

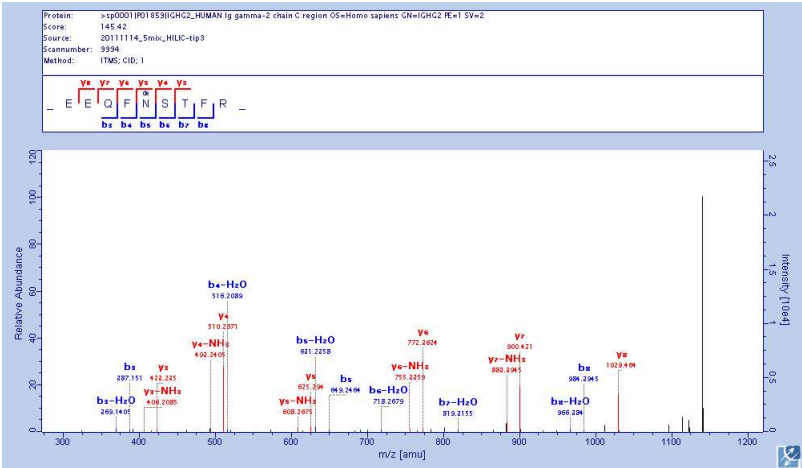

EEQYNSTFR

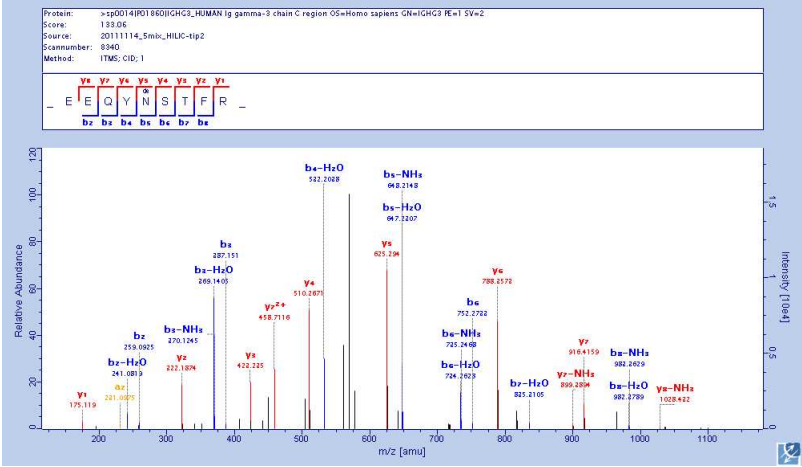

EEQFNSTYR

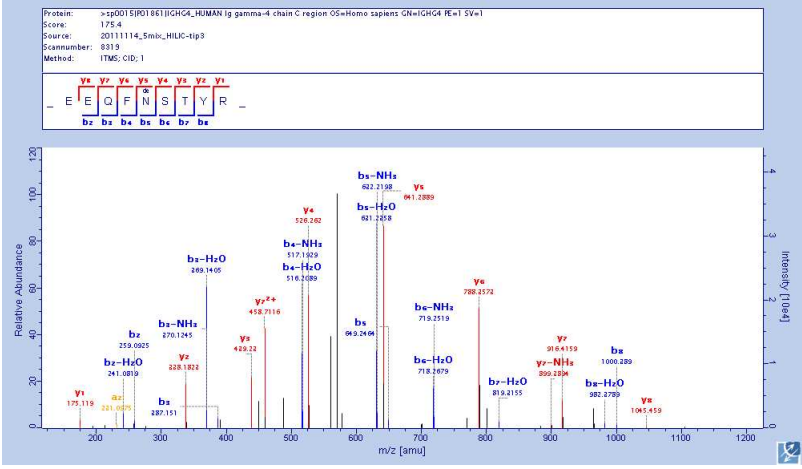

WTNDLGSNMTIGAVNSR

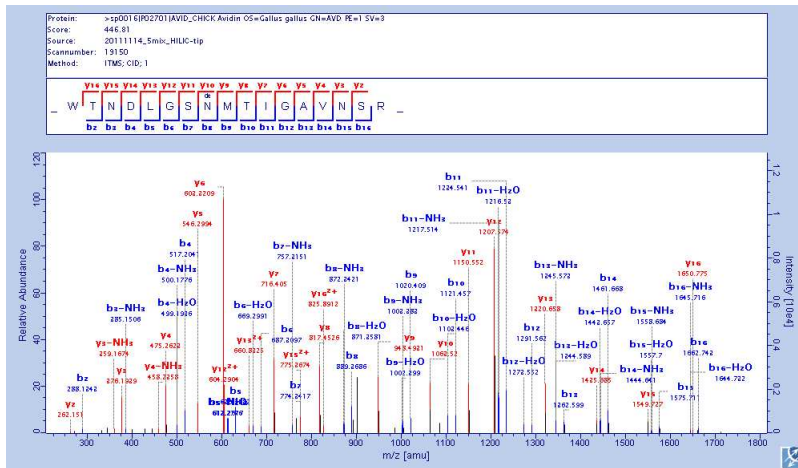CSLTGKWTNDLGSNMTIGAVNSR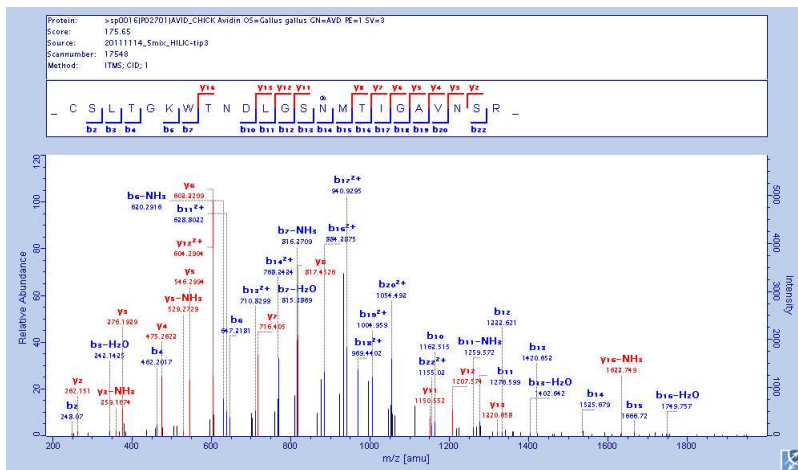

Supplement: Supplementary file 1 [file 4159552]
